# Supplementary material
Source: PubMed Central journal article supplement (PMC3349895)

# Supplementary Figure 1

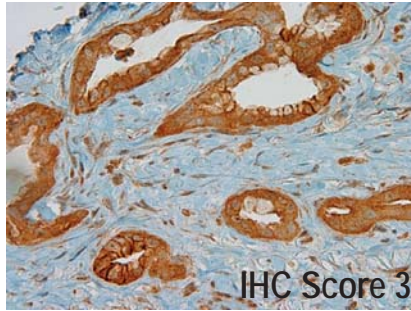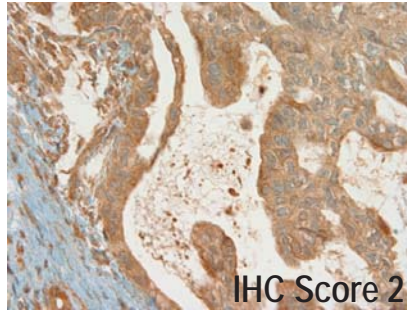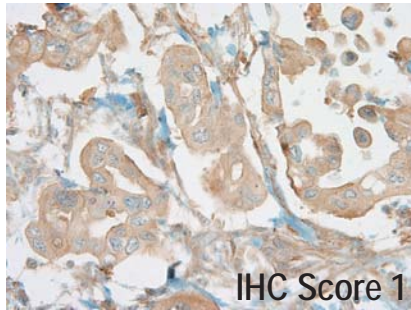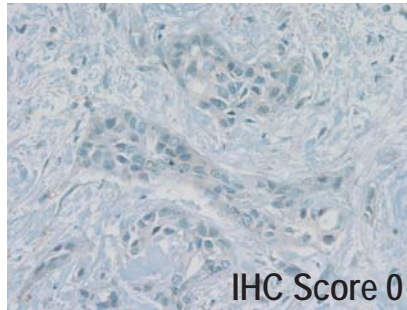

pTyr284-Ack1

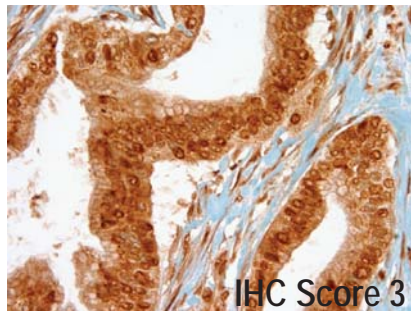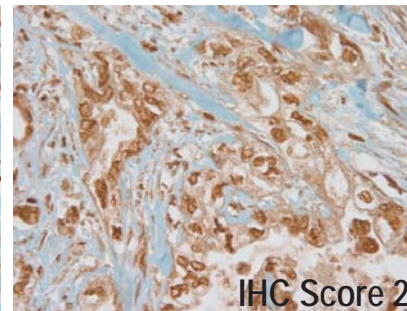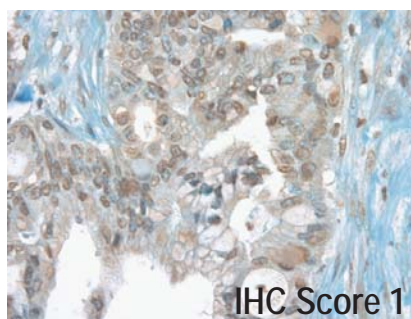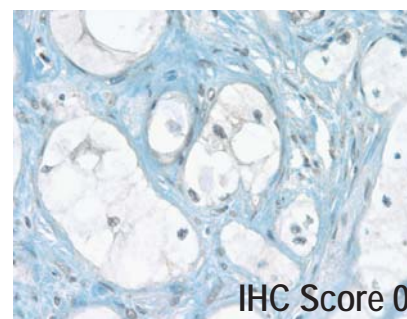

pTyr176-AKT

Supplement: mmc1.pdf [file mmc1.pdf]

## Supplementary Figure 2

**A**

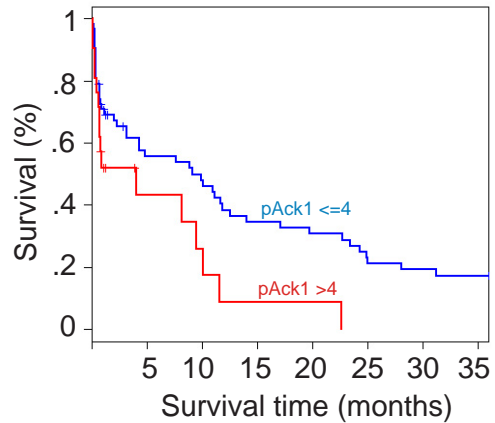

**B**

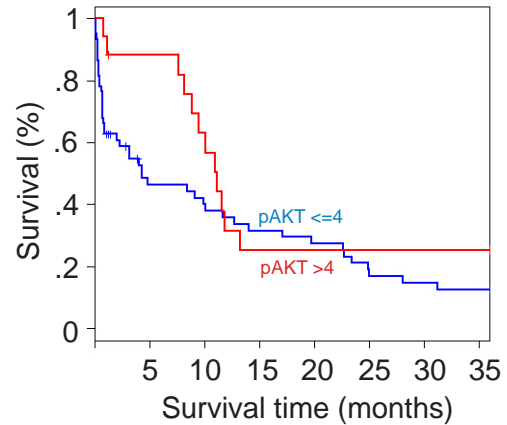

Supplement: mmc2.pdf [file mmc2.pdf]

## Supplementary Figure 3

**A**

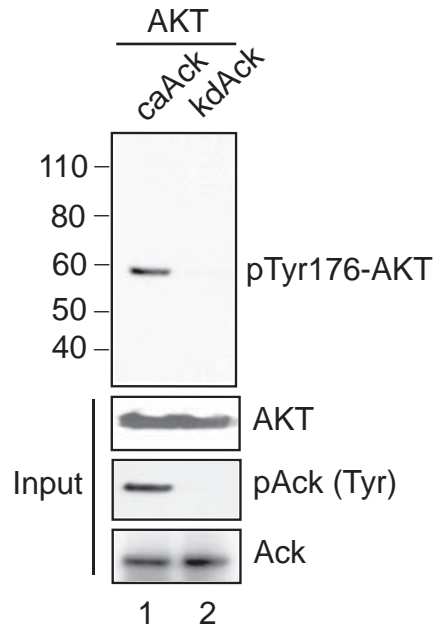

**B**

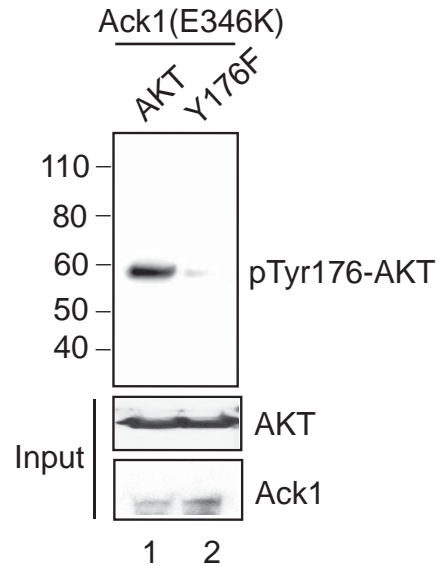

Supplement: mmc3.pdf [file mmc3.pdf]

## Supplementary Figure 4

**A**

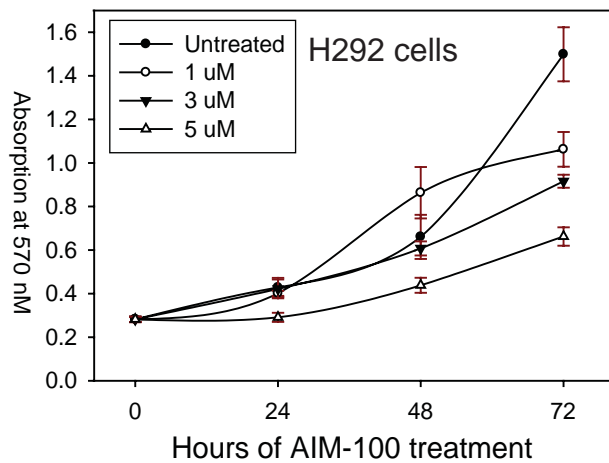

**B**

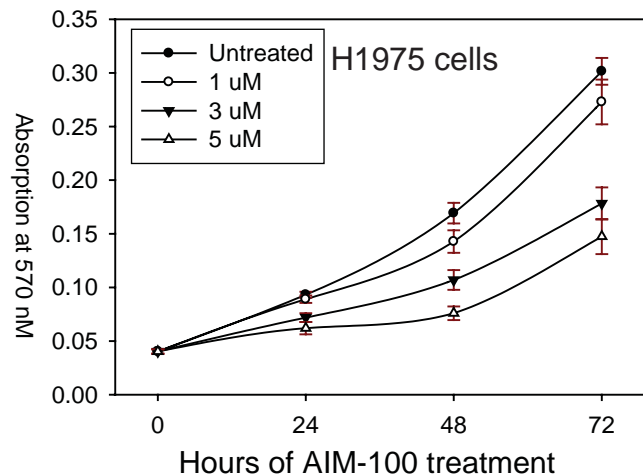

Supplement: mmc4.pdf [file mmc4.pdf]
